# Supplementary material for: Quantitative elemental analysis of human leukemia K562 single cells by inductively coupled plasma mass spectrometry in combination with a microdroplet generator
Source: Royal Society of Chemistry journal article supplement (doi:10.1039/d4ja00364k), 2024-12-02
Supplement: d4ja00364k1.pdf [file d4ja00364k1.pdf]

## Supporting Information

### Quantitative elemental analysis of human leukemia K562 single cells by inductively coupled plasma mass spectrometry in combination with a microdroplet generator

Yu-ki Tanaka\*, Hinano Katayama, Risako Iida, and Yasumitsu Ogra

Graduate School of Pharmaceutical Sciences, Chiba University, 1-8-1 Inohana, Chuo, Chiba 260-8675, Japan

\*Corresponding Author

Yu-ki Tanaka

Tel/Fax: +81 43 226 2945 / E-mail: [yu-ki.tanaka@chiba-u.jp](mailto:yu-ki.tanaka@chiba-u.jp)

#### Table of Contents

- p. S2...Fig. S1.** Calibration curves of five essential elements obtained from differently sized droplets
- p. S3...Fig. S2.** Images of microdroplets generated by three  $\mu$ DGs
- p. S4...Fig. S3.** Correction of instrumental sensitivity drift by the signals of standard solution introduced using a nebulizer
- p. S5...Fig. S4.** Signal profiles from time-resolved analysis of Ag and TiO<sub>2</sub> nanoparticles
- p. S6...Fig. S5.** Signal profiles from time-resolved analysis of yeast cells
- p. S7...Fig. S6.** Signal profiles from time-resolved analysis of K562 cells
- p. S8...Fig. S7.** Influence of chemical fixation with 70% methanol on elemental contents in K562 cells

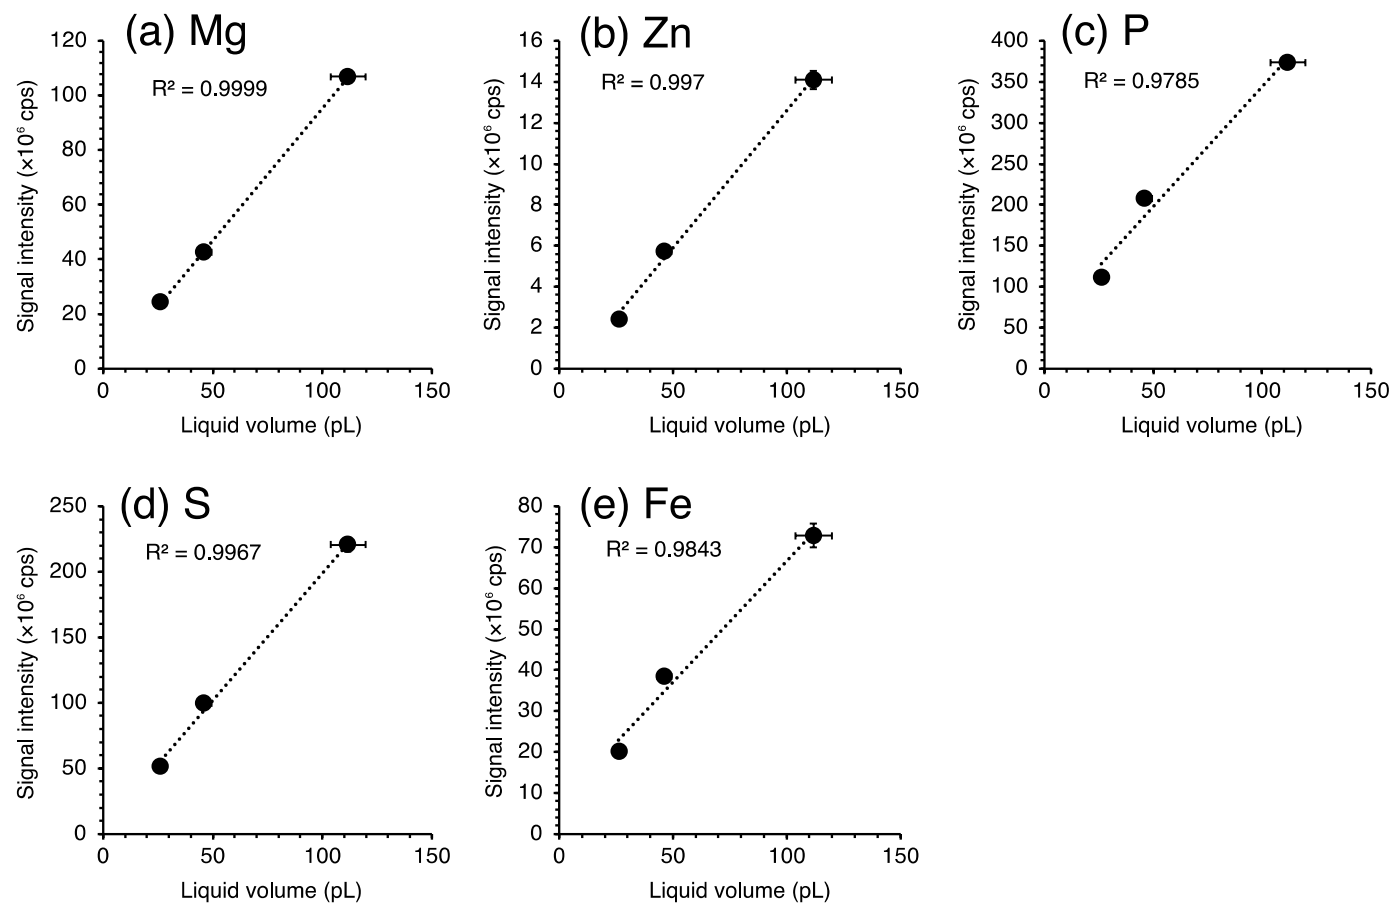

**Fig. S1.** Calibration curves of five essential elements obtained from differently sized droplet

(a) IJHB 30

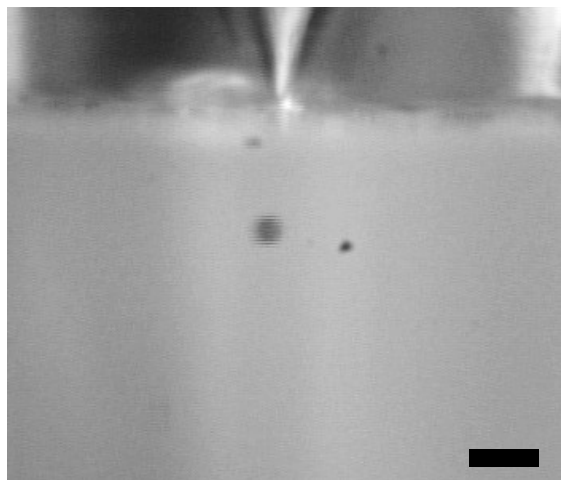

(b) IJHB 100

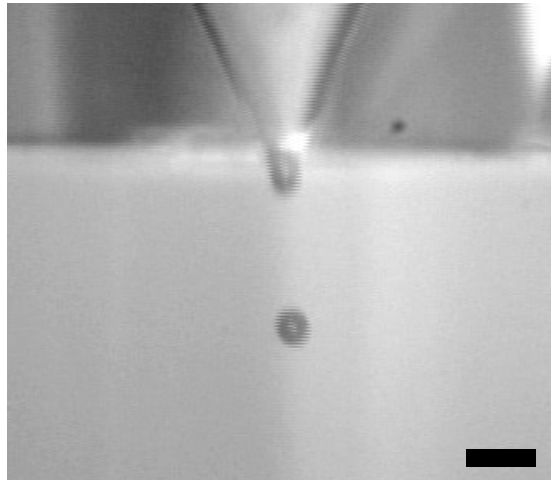

(c) IJHB 300

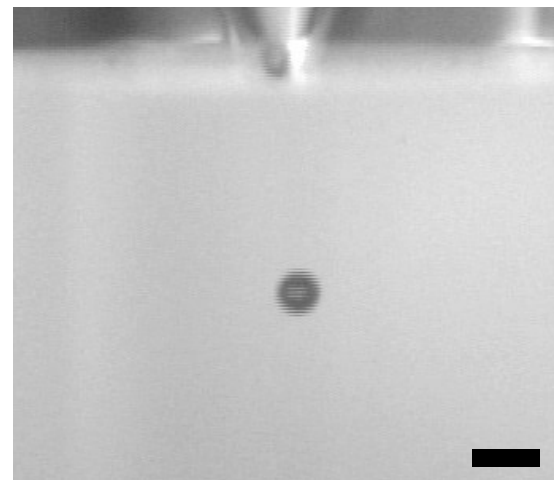

**Fig. S2.** Images of microdroplets generated by three  $\mu$ DGs  
(a)IJHB 30, (b) IJHB 100, and (c) IJHB 300. Scale bar represents 100  $\mu$ m.

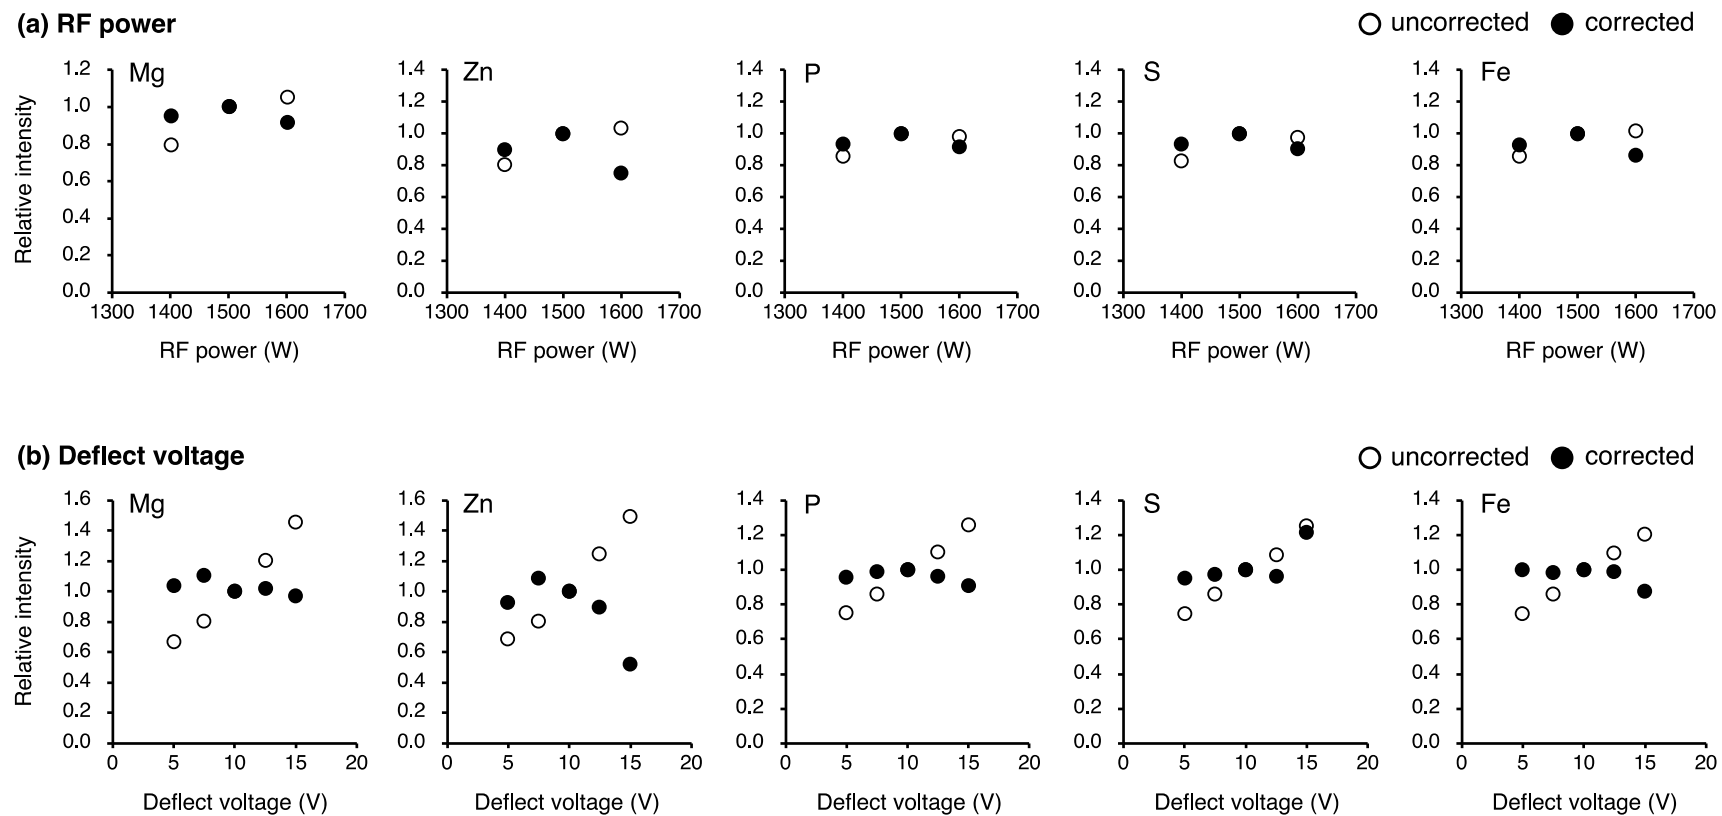

**Fig. S3.** Correction of instrumental sensitivity drift by the signals of standard solution introduced using a nebulizer. Signal intensity was monitored by changing (a) RF power and (b) deflect voltage. Signal intensities were normalized by the signals obtained with RF power of 1500 W for (a) and 10 V for (b). Error bars (SD) are included in each symbol.

(a) Ag 60 nm

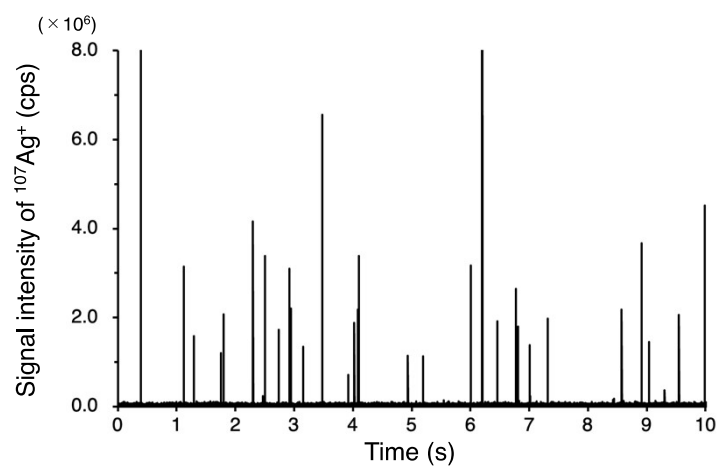

(b) Ag 100 nm

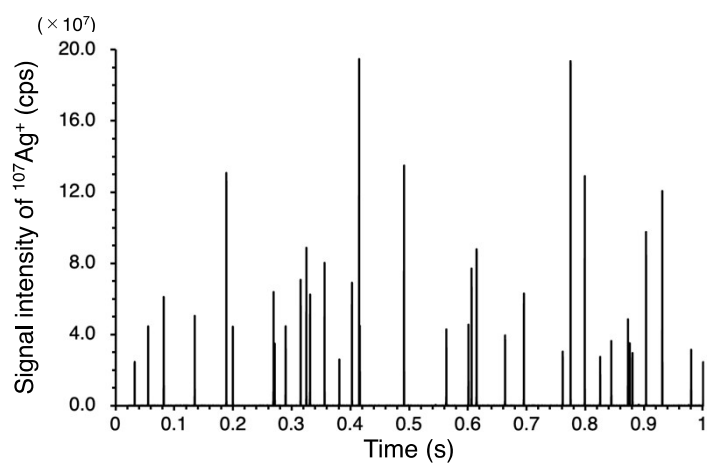

(c)  $\text{TiO}_2$  300 nm

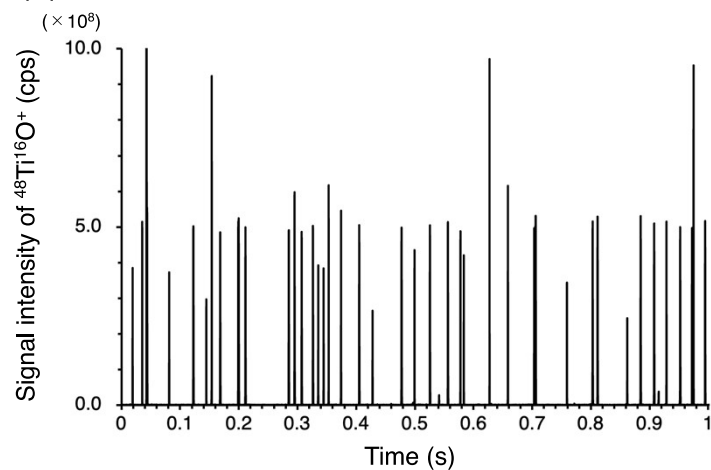

**Fig. S4.** Signal profiles from time-resolved analysis of Ag and  $\text{TiO}_2$  nanoparticles

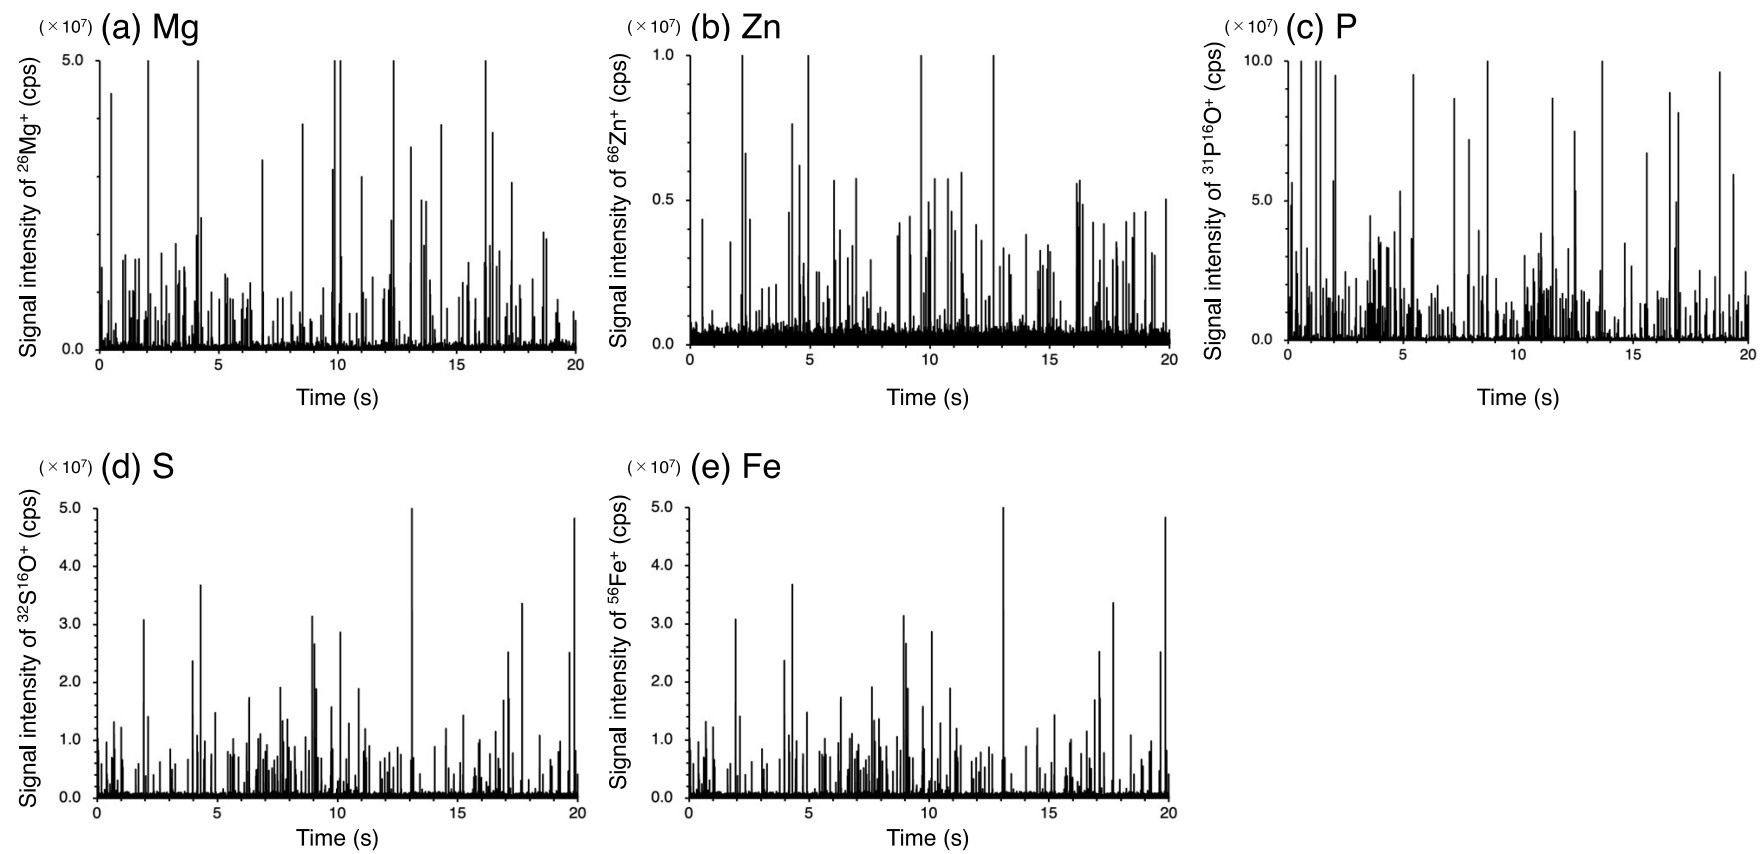

**Fig. S5.** Signal profiles from time-resolved analysis of yeast cells

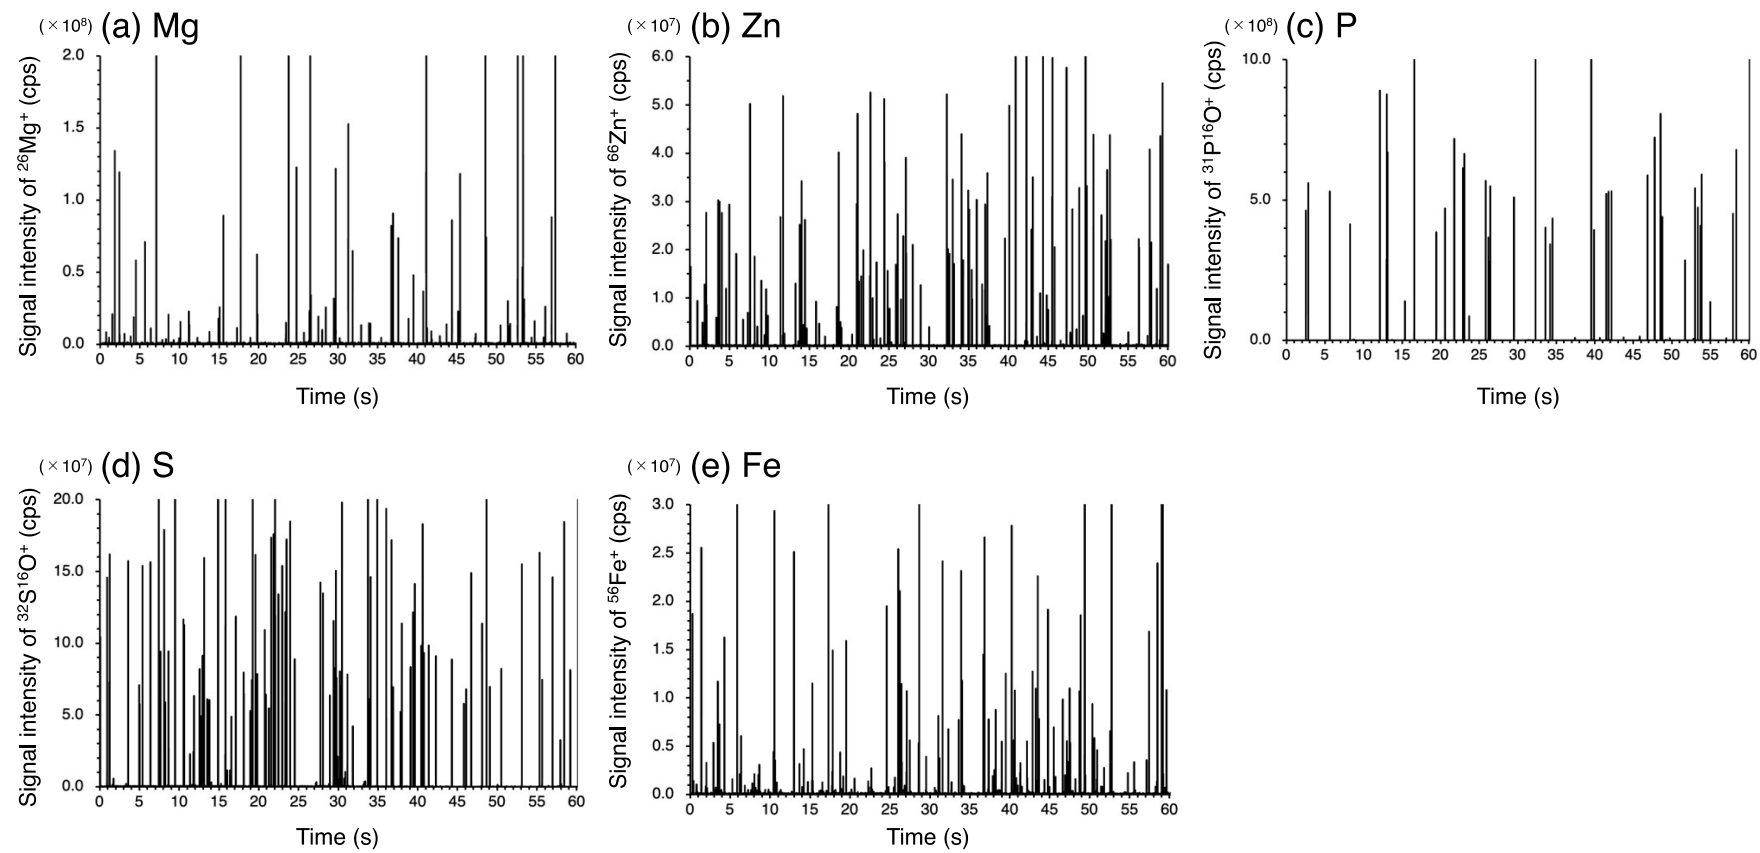

**Fig. S6.** Signal profiles from time-resolved analysis of K562 cells

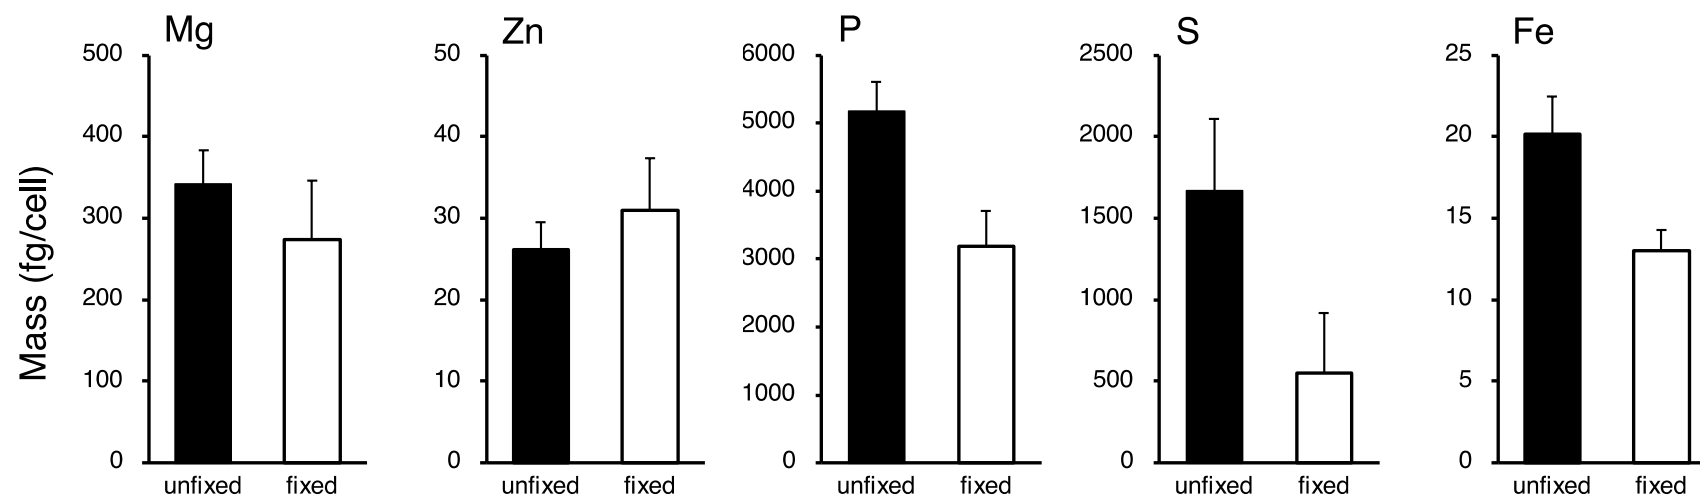

**Fig. S7.** Influence of chemical fixation with 70% methanol on elemental contents in K562 cells
